# Supplementary material
Source: MDPI journal article supplement (https://www.mdpi.com/2674-0389/1/4/26)
Supplement: s1 [file s1]

Archive with 1 entries (1 files):
- methane-1952188-supplementary.pdf
